# Supplementary material
Source: PubMed Central journal article supplement (PMC8647458)
Supplement: 40545_2021_384_MOESM1_ESM.pdf [file 40545_2021_384_MOESM1_ESM.pdf]

## Medication Reconciliation Data Collection Form

**Patient Demographics:**

MRN #: \_\_\_\_\_ Age: \_\_\_\_\_ Gender: \_\_\_\_\_ Wt: \_\_\_\_\_ Ht: \_\_\_\_\_ CrCl: \_\_\_\_\_

 Allergies: \_\_\_\_\_ Admission Date: \_\_\_\_\_ Information Source:
 

|                            |
|----------------------------|
| Patient Interview          |
| Family Member              |
| Previous Medical Record    |
| Home Meds Bottles Or Boxes |

Number of home meds: \_\_\_\_\_ Surgery type: \_\_\_\_\_

Time needed to collect the medication history: \_\_\_\_\_ min      Attending Surgeon: \_\_\_\_\_

| (Name / Dose / Route / Frequency)<br>(including OTC Products and Herbs) | Indication | Compliant? | Last dose taken (Time) | Should continue on admission | cont'd? | substituted? | Reason for Withhold, and verified? |
|-------------------------------------------------------------------------|------------|------------|------------------------|------------------------------|---------|--------------|------------------------------------|
|                                                                         |            |            |                        |                              |         |              |                                    |
|                                                                         |            |            |                        |                              |         |              |                                    |
|                                                                         |            |            |                        |                              |         |              |                                    |
|                                                                         |            |            |                        |                              |         |              |                                    |
|                                                                         |            |            |                        |                              |         |              |                                    |
|                                                                         |            |            |                        |                              |         |              |                                    |
|                                                                         |            |            |                        |                              |         |              |                                    |
|                                                                         |            |            |                        |                              |         |              |                                    |
|                                                                         |            |            |                        |                              |         |              |                                    |
|                                                                         |            |            |                        |                              |         |              |                                    |
|                                                                         |            |            |                        |                              |         |              |                                    |
|                                                                         |            |            |                        |                              |         |              |                                    |

Current medications order form from patient medical chart:

| <b>Indication</b> | <b>Drug/dose/frequency/route</b> |
|-------------------|----------------------------------|
|                   |                                  |
|                   |                                  |
|                   |                                  |
|                   |                                  |
|                   |                                  |
|                   |                                  |
|                   |                                  |
|                   |                                  |
|                   |                                  |
|                   |                                  |
|                   |                                  |
|                   |                                  |
|                   |                                  |
|                   |                                  |
|                   |                                  |
|                   |                                  |
|                   |                                  |

**Critical Analysis of Discrepancies**

One-to-one Match  Intended, Justified Discrepancies  Unintended Discrepancies

**Total Number of Reconciliation Errors/Unintended Discrepancies:** \_\_\_\_\_

**REs by Medication Type:**

Over the Counter (OTC)  Prescription  Herbal  Allergies

**Discrepancies by Error Type:**

Unintended Omission  Wrong drug  Wrong dose  Wrong route  Wrong frequency  
 Duplication  Drug interaction  Allergy alert  Wrong allergy  Unjustified Omission

**REs by Route of Medications involved:**

Oral  SC  Buccal  Inhaled  Ophthalmic  
 IM  IV  Rectal  Otic  Topical

**REs by Therapeutic/Pharmacological Class of Medications involved:**

Diuretic  Lipid Modifying  Antipsychotic  Drug for acid disorders  Antibiotic  
 Beta Blocker  Analgesic  Oral Antidiabetic  Vitamin  Mineral Supplements  
 Antiepileptic  Insulin  Antidepressants  Antidiarrheals/Laxatives/Antispasmodics  
 Anti-Parkinson  ACE/ARB  Drugs for asthma/COPD **Other. Specify:** \_\_\_\_\_

**REs by Surgical Department:**

Cardiovascular  Urology  Orthopedics  Gastrointestinal  Neurology  Plastic  Thoracic

**REs Involving High-Alert Medication**  Yes  No

**Proximal cause leading to the reconciliation errors (as determined by the pharmacist)**

Clinician knowledge (ie, lacking familiarity with medication regimens)  
 Patient knowledge (ie, lacking familiarity regarding their medication regimens)  
 Dosage form confusion

- Brand name and generic name similarity (Look-Alike and Sound-Alike)
- Non-compliance of physicians with evidence-based recommendations
- Unknown (ie, pharmacist unable to determine potential cause leading to medication error)

**Potential severity of the error:**

- Clinically insignificant (Error that would not likely cause harm)  
Ex: Omission of oral ferrous sulfate, omission of statin, wrong PPI Dose
- Significant (have the potential to cause harm and require increased monitoring)  
Ex: Wrong dose of antihypertensive
- Serious (have the potential to cause harm and likely to require 1)intervention or 2)prolonged hospital stay)  
Ex: Wrong dose of warfarin, omission of levertiracetam for seizure disorder
- Life-threatening (have the potential to cause death)  
Ex: Wrong controlled release morphine death, Nifedipine 90mg immediate release ordered instead of SR.

**Medication-related Interventions:**

Type of intervention:

- Adjust dose     Add a drug     D/C a drug     Adjust frequency     Adjust route
- Educate the patient     Highlight drug interactions     Highlight a drug-disease interactions
- Monitor drug parameter(s)     Discontinue drug/give from home supply     Suggesting alternative brand

Total number of interventions: \_\_\_\_\_

- Accepted     Rejected     Pending review

| Intervention type | Intervention | Accepted |
|-------------------|--------------|----------|
|                   |              |          |
|                   |              |          |
|                   |              |          |
|                   |              |          |
